# Supplementary material for: Curcumin Requires Tumor Necrosis Factor α Signaling to Alleviate Cognitive Impairment Elicited by Lipopolysaccharide
Source: PubMed Central journal article supplement — Neurosignals. Author manuscript; Available in PMC 2018 Apr 10. (PMC5893139; doi:10.1159/000336074), 2012-05-09
Supplement: NIHMS953284-supplement-Supplemental_Material.pdf [file NIHMS953284-supplement-Supplemental_Material.pdf]

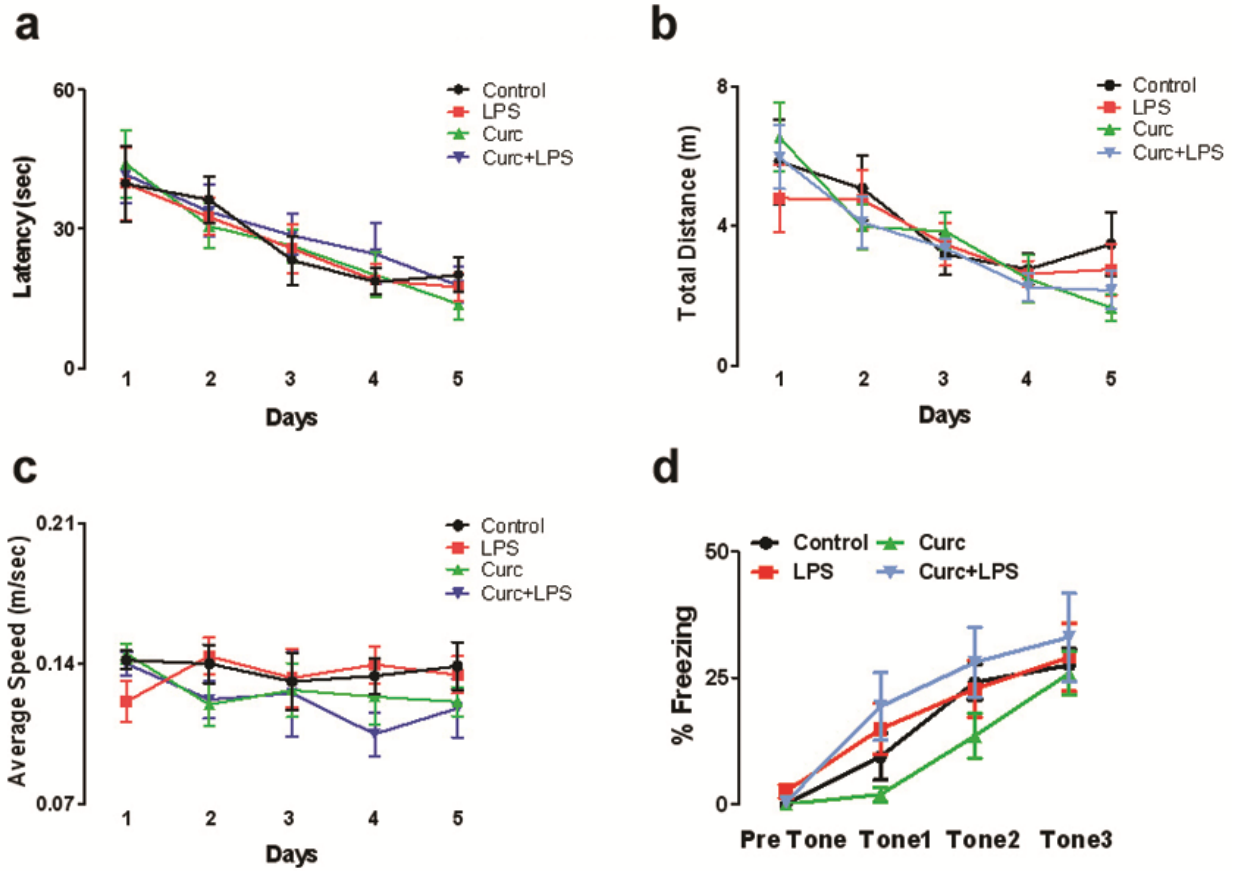

**Figure 1.** Daily progression of memory flexibility (a), total distance swam (b) and swimming speed (c) during the training period of the Morris water maze test. Values shown are mean  $\pm$  S.E.M. (n=10). Percentage of time spent freezing (d) during the training session of the fear conditioning test. Data shown are mean  $\pm$  S.E.M (n = 4-5).

### Supplemental Table 1

Percent freezing time of WT and DKO mice during the amygdala-dependent portion of the fear conditioning test.

|                 | <b>WT (%)</b> | <b>DKO (%)</b> |
|-----------------|---------------|----------------|
| <b>Control</b>  | 27.3 ± 2.20   | 27.1 ± 6.1     |
| <b>LPS</b>      | 27.1 ± 7.40   | 22.0 ± 4.2     |
| <b>Curc</b>     | 32.9 ± 7.80   | 23.4 ± 5.2     |
| <b>Curc+LPS</b> | 23.5 ± 10.0   | 17.2 ± 3.9     |

### Supplemental Table 2

Levels of pro-inflammatory markers in hippocampi at 7 days post drug treatment.

|                 | <b>TNF-<math>\alpha</math></b><br>(pg/ $\mu$ g proteins) | <b>IL-1<math>\beta</math></b><br>(pg/ $\mu$ g proteins) | <b>NOS</b><br>(NOS/Actin) |
|-----------------|----------------------------------------------------------|---------------------------------------------------------|---------------------------|
| <b>Control</b>  | 0.80 ± 0.18                                              | 0.09 ± 0.01                                             | 1.00 ± 0.04               |
| <b>LPS</b>      | 0.80 ± 0.14                                              | 0.09 ± 0.02                                             | 1.25 ± 0.04               |
| <b>Curc</b>     | 0.66 ± 0.06                                              | 0.08 ± 0.02                                             | 1.06 ± 0.08               |
| <b>Curc+LPS</b> | 0.78 ± 0.39                                              | 0.08 ± 0.02                                             | 1.27 ± 0.13               |
